# Supplementary material for: A hollow core–shell structure material NiCo2S4@Ni2P with uniform heterojunction for efficient photocatalytic H2 evolution reaction
Source: Royal Society of Chemistry journal article supplement (doi:10.1039/c9nj04555d), 2019-01-01
Supplement: c9nj04555d1.pdf [file c9nj04555d1.pdf]

## **Supporting Information**

### **A hollow core-shell structure material NiCo<sub>2</sub>S<sub>4</sub>@Ni<sub>2</sub>P with uniform heterojunction for efficient photocatalytic H<sub>2</sub> evolution reaction**

**Sheng Zhao<sup>1</sup>, Jing Xu<sup>\*1,2,3,4</sup>, Zeying Liu<sup>1</sup>, Yanru Li<sup>1</sup>**

**1 School of Chemistry and Chemical Engineering, North Minzu University,  
Yinchuan 750021, PR China**

**2 State Key Laboratory of High-efficiency Utilization of Coal and Green  
Chemical Engineering, Ningxia University, Yinchuan, 750021, PR China**

**3 Key Laboratory of Chemical Engineering and Technology (North Minzu  
University), State Ethnic Affairs Commission, Yinchuan 750021, P.R.China**

**4 Ningxia key laboratory of solar chemical conversion technology, Yinchuan  
750021, PR China**

**Email: wgyxj2000@163.com**

1.

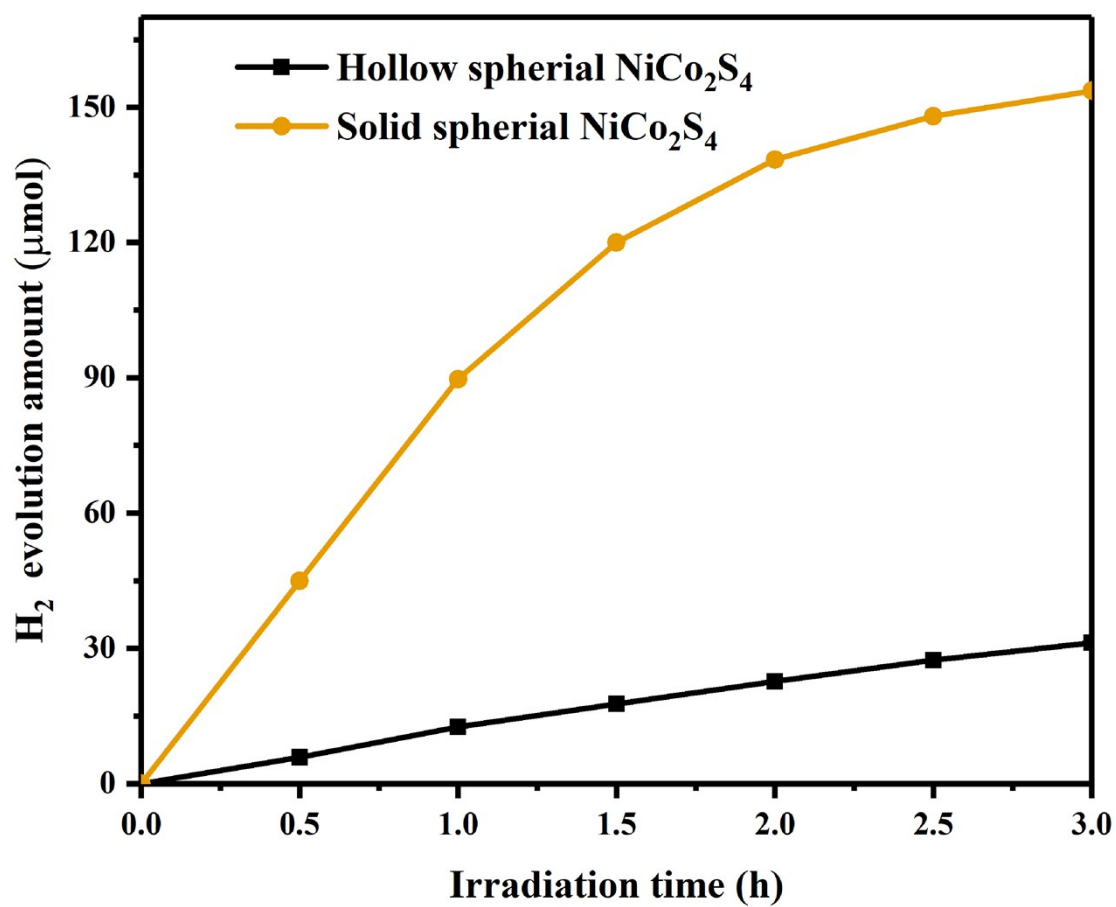

Fig. S1  $\text{H}_2$  evolution curves of solid spherical  $\text{NiCo}_2\text{S}_4$  and hollow spherical  $\text{NiCo}_2\text{S}_4$ .

2.

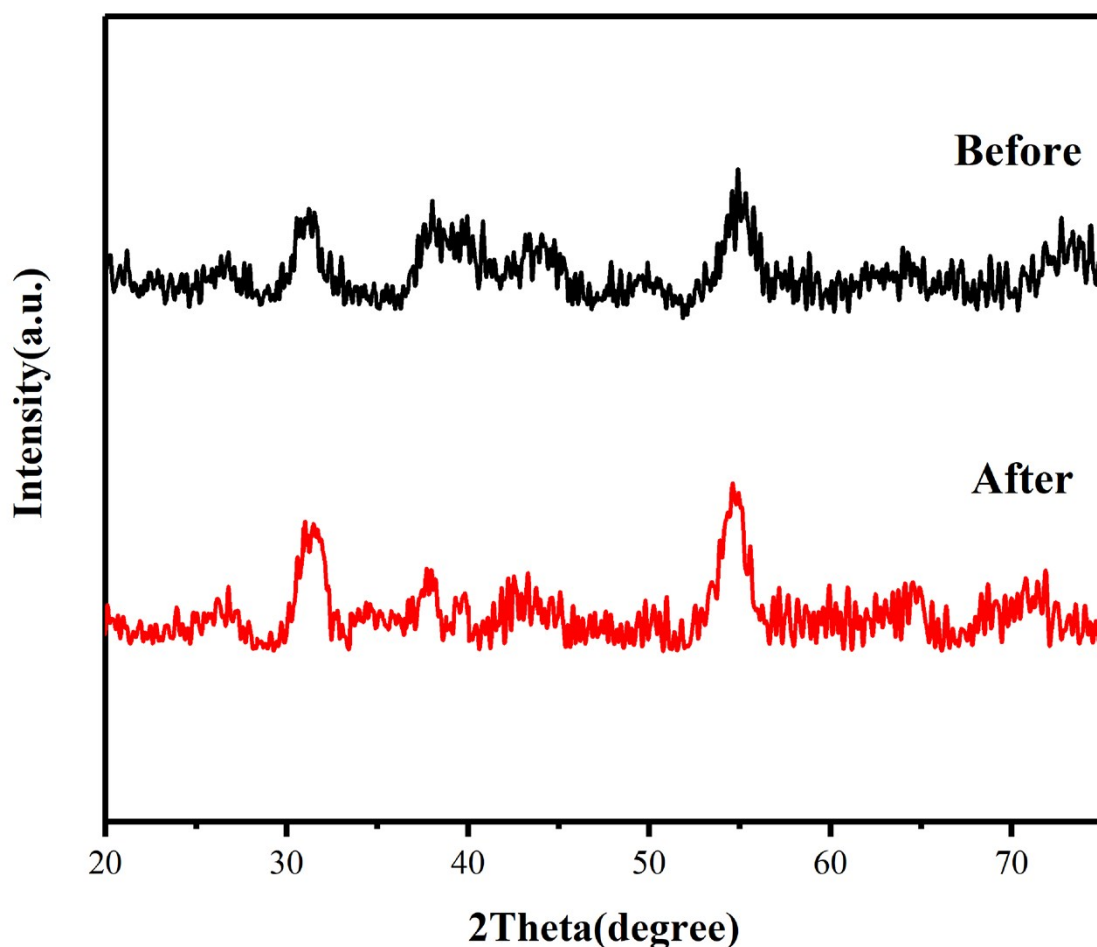

Fig. S2 XRD patterns of NiCo<sub>2</sub>S<sub>4</sub>@Ni<sub>2</sub>P 10% before and after before and after stability tests (12h).

### 3. Band potential calculation

$$E_{CB} = X - E_c + 0.5E_g$$

$$E_{VB} = E_{CB} + E_g$$

In the above formulas, X is the absolute electronegativity of the calculated material;  $E_g$  is the band gap width of the material;  $E_{CB}$  and  $E_{VB}$  and the conduction band and valence band potential (VS.NHE) of the corresponding materials respectively;  $E_c$  is the difference value from standard hydrogen electrode and vacuum level (about 4.5eV).  $E_g$  value of NiCo<sub>2</sub>S<sub>4</sub> is derived from the UV-vis DRS tests. A number of previous reports have shown that the  $E_g$  value of Ni<sub>2</sub>P is about 1.0eV.

Pearson Absolute Electronegativity of different elements comes from the following

database:

[http://www.knowledgedoor.com/2/elements\\_handbook/pearson\\_absolute\\_electronegativity.html#opennewwindow?tdsourcetag=s\\_pcqq\\_aiomsg](http://www.knowledgedoor.com/2/elements_handbook/pearson_absolute_electronegativity.html#opennewwindow?tdsourcetag=s_pcqq_aiomsg)

NiCo<sub>2</sub>S<sub>4</sub>:

$$X = [x(\text{Ni}) * x(\text{Co})^2 * x(\text{S})^4]^{1/7} = [x(4.40) * x(4.30)^2 * x(6.22)^4]^{1/7} = 5.32 \text{ eV}$$

$$E_g = 2.49 \text{ eV}$$

$$E_{\text{CB}} = X - E_c - 0.5E_g = 5.32 - 4.5 - 0.5 * 2.49 = -0.42 \text{ eV}$$

$$E_{\text{VB}} = E_{\text{CB}} + E_g = -0.42 + 2.49 = 2.07 \text{ eV}$$

Ni<sub>2</sub>P:

$$X = [x(\text{Ni})^2 * x(\text{P})]^{1/3} = [x(4.40)^2 * x(5.62)]^{1/3} = 4.77 \text{ eV}$$

$$E_g = 1.00 \text{ eV}$$

$$E_{\text{CB}} = X - E_c - 0.5E_g = 4.77 - 4.5 - 0.5 * 1.00 = -0.23 \text{ eV}$$

$$E_{\text{VB}} = E_{\text{CB}} + E_g = -0.23 + 1.00 = 0.77 \text{ eV}$$
